# Supplementary material for: Associations between health culture, health behaviors, and health-related outcomes: A cross-sectional study
Source: PubMed Central journal article supplement (PMC5528893; doi:10.1371/journal.pone.0178644), 2017-07-26
Supplement: pone.0178644.s002.pdf [file pone.0178644.s002.pdf]

| B3.Flourishing Scale                                                       | Strongly                   | 1                          | 2                          | 3                          | 4                          | 5                          | 6                          | 7 | Strongly |
|----------------------------------------------------------------------------|----------------------------|----------------------------|----------------------------|----------------------------|----------------------------|----------------------------|----------------------------|---|----------|
|                                                                            | disagree                   |                            |                            |                            |                            |                            |                            |   | agree    |
| B3.1 I lead a purposeful and meaningful life                               | <input type="checkbox"/> 1 | <input type="checkbox"/> 2 | <input type="checkbox"/> 3 | <input type="checkbox"/> 4 | <input type="checkbox"/> 5 | <input type="checkbox"/> 6 | <input type="checkbox"/> 7 |   |          |
| B3.2 My social relationships are supportive and rewarding                  | <input type="checkbox"/> 1 | <input type="checkbox"/> 2 | <input type="checkbox"/> 3 | <input type="checkbox"/> 4 | <input type="checkbox"/> 5 | <input type="checkbox"/> 6 | <input type="checkbox"/> 7 |   |          |
| B3.3 I am engaged and interested in my daily activities                    | <input type="checkbox"/> 1 | <input type="checkbox"/> 2 | <input type="checkbox"/> 3 | <input type="checkbox"/> 4 | <input type="checkbox"/> 5 | <input type="checkbox"/> 6 | <input type="checkbox"/> 7 |   |          |
| B3.4 I actively contribute to the happiness and well-being of others       | <input type="checkbox"/> 1 | <input type="checkbox"/> 2 | <input type="checkbox"/> 3 | <input type="checkbox"/> 4 | <input type="checkbox"/> 5 | <input type="checkbox"/> 6 | <input type="checkbox"/> 7 |   |          |
| B3.5 I am competent and capable in the activities that are important to me | <input type="checkbox"/> 1 | <input type="checkbox"/> 2 | <input type="checkbox"/> 3 | <input type="checkbox"/> 4 | <input type="checkbox"/> 5 | <input type="checkbox"/> 6 | <input type="checkbox"/> 7 |   |          |
| B3.6 I am a good person and live a good life                               | <input type="checkbox"/> 1 | <input type="checkbox"/> 2 | <input type="checkbox"/> 3 | <input type="checkbox"/> 4 | <input type="checkbox"/> 5 | <input type="checkbox"/> 6 | <input type="checkbox"/> 7 |   |          |
| B3.7 I am optimistic about my future                                       | <input type="checkbox"/> 1 | <input type="checkbox"/> 2 | <input type="checkbox"/> 3 | <input type="checkbox"/> 4 | <input type="checkbox"/> 5 | <input type="checkbox"/> 6 | <input type="checkbox"/> 7 |   |          |
| B3.8 People respect me                                                     | <input type="checkbox"/> 1 | <input type="checkbox"/> 2 | <input type="checkbox"/> 3 | <input type="checkbox"/> 4 | <input type="checkbox"/> 5 | <input type="checkbox"/> 6 | <input type="checkbox"/> 7 |   |          |

### Part 3 Health-related Behaviors

C1. Have you smoked for more than 100 cigarettes?

no yes

C2 In the past week, have you exposed to (sustained or cumulative) smoke for 15 minutes or more?

yes \_\_\_\_\_ days none

C3. In the past week, please indicate your physical activity: (Only report physical activity for 10 minutes or more )

| Physical activity                                                                                                                                                               | In the last 7 days | Average time every day |
|---------------------------------------------------------------------------------------------------------------------------------------------------------------------------------|--------------------|------------------------|
| <b>a.Heavy physical activity</b> ( refers to activities that require you to spend a lot of effort and breathe more than usual). For example:                                    | ____Days           | ____Min                |
| <b>b.Moderate physical activity</b> (refers to activities that require you to spend moderate effort and breathe slightly more usual). For example:                              | ____Days           | ____Min                |
| <b>c.Walking</b> ( including your work and walking at home, walking on footsteps and walking for exercise).                                                                     | ____Days           | ____Min                |
| <b>d.Sedentary behavior</b> (including working at home, sitting at the desk, before the computer, sitting or lying for watching TV, visiting friends, reading, traveling, etc.) | ____Days           | ____Min                |

C4. Do you drink alcohol (such as beer, wine, white wine, red wine, rice wine, etc.)?

yes

no

### Part 4 Health culture

| <b>Workplace health culture</b>                                              | Strongly disagree          | 1                          | 2                          | 3                          | 4                          | 5 | Strongly agree |
|------------------------------------------------------------------------------|----------------------------|----------------------------|----------------------------|----------------------------|----------------------------|---|----------------|
| <b>Individual</b>                                                            |                            |                            |                            |                            |                            |   |                |
| D1 It is important for me to lead a healthy lifestyle                        | <input type="checkbox"/> 1 | <input type="checkbox"/> 2 | <input type="checkbox"/> 3 | <input type="checkbox"/> 4 | <input type="checkbox"/> 5 |   |                |
| D2 Participation in health activities can enlarge my circle of friends       | <input type="checkbox"/> 1 | <input type="checkbox"/> 2 | <input type="checkbox"/> 3 | <input type="checkbox"/> 4 | <input type="checkbox"/> 5 |   |                |
| D3 Employee will be commended and paid attention to due to healthy behaviors | <input type="checkbox"/> 1 | <input type="checkbox"/> 2 | <input type="checkbox"/> 3 | <input type="checkbox"/> 4 | <input type="checkbox"/> 5 |   |                |
| D4 My family or roommates support me to lead a healthy lifestyle             | <input type="checkbox"/> 1 | <input type="checkbox"/> 2 | <input type="checkbox"/> 3 | <input type="checkbox"/> 4 | <input type="checkbox"/> 5 |   |                |
| <b>Direct leadership</b>                                                     |                            |                            |                            |                            |                            |   |                |
| D5 My direct leaders like smoking                                            | <input type="checkbox"/> 1 | <input type="checkbox"/> 2 | <input type="checkbox"/> 3 | <input type="checkbox"/> 4 | <input type="checkbox"/> 5 |   |                |
| D6 My direct leaders like drinking                                           | <input type="checkbox"/> 1 | <input type="checkbox"/> 2 | <input type="checkbox"/> 3 | <input type="checkbox"/> 4 | <input type="checkbox"/> 5 |   |                |
| D7 My direct leaders encourage me to smoke                                   | <input type="checkbox"/> 1 | <input type="checkbox"/> 2 | <input type="checkbox"/> 3 | <input type="checkbox"/> 4 | <input type="checkbox"/> 5 |   |                |
| D8 My direct leaders encourage me to drink                                   | <input type="checkbox"/> 1 | <input type="checkbox"/> 2 | <input type="checkbox"/> 3 | <input type="checkbox"/> 4 | <input type="checkbox"/> 5 |   |                |
| D9 My direct leaders hope that I can work overtime                           | <input type="checkbox"/> 1 | <input type="checkbox"/> 2 | <input type="checkbox"/> 3 | <input type="checkbox"/> 4 | <input type="checkbox"/> 5 |   |                |
| D10 My direct leaders like to exercise                                       | <input type="checkbox"/> 1 | <input type="checkbox"/> 2 | <input type="checkbox"/> 3 | <input type="checkbox"/> 4 | <input type="checkbox"/> 5 |   |                |
| D11 My direct leaders encourage me to exercise                               | <input type="checkbox"/> 1 | <input type="checkbox"/> 2 | <input type="checkbox"/> 3 | <input type="checkbox"/> 4 | <input type="checkbox"/> 5 |   |                |
| D12 My direct leaders encourage me to lead a healthy lifestyle               | <input type="checkbox"/> 1 | <input type="checkbox"/> 2 | <input type="checkbox"/> 3 | <input type="checkbox"/> 4 | <input type="checkbox"/> 5 |   |                |
| D13 My direct leaders support each other to lead a healthy lifestyle         | <input type="checkbox"/> 1 | <input type="checkbox"/> 2 | <input type="checkbox"/> 3 | <input type="checkbox"/> 4 | <input type="checkbox"/> 5 |   |                |
| <b>Workplace</b>                                                             |                            |                            |                            |                            |                            |   |                |
| D14 Resources are provided to support health promotion                       | <input type="checkbox"/> 1 | <input type="checkbox"/> 2 | <input type="checkbox"/> 3 | <input type="checkbox"/> 4 | <input type="checkbox"/> 5 |   |                |
| D15 Employee are taught to lead a healthy lifestyle                          | <input type="checkbox"/> 1 | <input type="checkbox"/> 2 | <input type="checkbox"/> 3 | <input type="checkbox"/> 4 | <input type="checkbox"/> 5 |   |                |
| D16 New employee notice organizational support on health behaviors           | <input type="checkbox"/> 1 | <input type="checkbox"/> 2 | <input type="checkbox"/> 3 | <input type="checkbox"/> 4 | <input type="checkbox"/> 5 |   |                |
| D17 Unhealthy behaviors are not encouraged                                   | <input type="checkbox"/> 1 | <input type="checkbox"/> 2 | <input type="checkbox"/> 3 | <input type="checkbox"/> 4 | <input type="checkbox"/> 5 |   |                |

|                                     |                            |                            |                            |                            |                            |
|-------------------------------------|----------------------------|----------------------------|----------------------------|----------------------------|----------------------------|
| D18 People have team spirit         | <input type="checkbox"/> 1 | <input type="checkbox"/> 2 | <input type="checkbox"/> 3 | <input type="checkbox"/> 4 | <input type="checkbox"/> 5 |
| D19 A consensus has been reached    | <input type="checkbox"/> 1 | <input type="checkbox"/> 2 | <input type="checkbox"/> 3 | <input type="checkbox"/> 4 | <input type="checkbox"/> 5 |
| D20 People have positive perception | <input type="checkbox"/> 1 | <input type="checkbox"/> 2 | <input type="checkbox"/> 3 | <input type="checkbox"/> 4 | <input type="checkbox"/> 5 |
