# Supplementary material for: Associations between health culture, health behaviors, and health-related outcomes: A cross-sectional study
Source: PLoS One. 2017 Jul 26;12(7):e0178644. doi: 10.1371/journal.pone.0178644 (PMC5528893; doi:10.1371/journal.pone.0178644)
Supplement: S1 File — (PDF) [file pone.0178644.s001.pdf]

## 第一部分 人口学信息

A1. 性别: 1)男 2)女

A2. 出生日期 \_\_\_\_\_年\_\_\_\_月

A3. 文化程度:  
1) 初中及以下 2) 高中、中专及技校 3) 大专 4) 本科 5) 硕士及以上

A4. 婚姻: 1) 未婚 2) 已婚(在婚) 3) 丧偶 4) 离婚 5) 其它\_\_\_\_\_

A5. 家庭人均月收入: 1) <800 元 2) 800-2000 元 3) 2000-4000 元  
4) 4000-6000 元 5) 6000-8000 元 6) >8000 元

A6. 单位类型: 1)企业 2)政府机关

B2.请在下面 5 个句子的描述中标出过去 2 周里你最接近的感觉状态。如：您在过去 2 周有一半以上时间感到快乐、心情舒畅，就在其后 3 对应的方框内打“√”。

| 过去 2 周                | 所有时间                       | 大部分时间                      | 超过一半时间                     | 少于一半时间                     | 有时候                        | 从未有过                       |
|-----------------------|----------------------------|----------------------------|----------------------------|----------------------------|----------------------------|----------------------------|
| B2.1 我感觉快乐、心情舒畅       | <input type="checkbox"/> 5 | <input type="checkbox"/> 4 | <input type="checkbox"/> 3 | <input type="checkbox"/> 2 | <input type="checkbox"/> 1 | <input type="checkbox"/> 0 |
| B2.2 我感觉宁静和放松         | <input type="checkbox"/> 5 | <input type="checkbox"/> 4 | <input type="checkbox"/> 3 | <input type="checkbox"/> 2 | <input type="checkbox"/> 1 | <input type="checkbox"/> 0 |
| B2.3 我感觉充满活力、精力充沛     | <input type="checkbox"/> 5 | <input type="checkbox"/> 4 | <input type="checkbox"/> 3 | <input type="checkbox"/> 2 | <input type="checkbox"/> 1 | <input type="checkbox"/> 0 |
| B2.4 我睡醒时感到清新、得到了充足休息 | <input type="checkbox"/> 5 | <input type="checkbox"/> 4 | <input type="checkbox"/> 3 | <input type="checkbox"/> 2 | <input type="checkbox"/> 1 | <input type="checkbox"/> 0 |
| B2.5 我每天的生活充满了有趣的事情   | <input type="checkbox"/> 5 | <input type="checkbox"/> 4 | <input type="checkbox"/> 3 | <input type="checkbox"/> 2 | <input type="checkbox"/> 1 | <input type="checkbox"/> 0 |

(7: 完全同意; 6: 同意; 5: 有点同意; 4: 既不同意也不反对; 3: 有点不同意; 2: 不同意; 1: 完全不同意).

| B3. 幸福感               | 完全不同意1234567完全同意 |    |    |    |    |    |    |
|-----------------------|------------------|----|----|----|----|----|----|
|                       | □1               | □2 | □3 | □4 | □5 | □6 | □7 |
| B3.1.我过着有追求和有意义的生活    | □1               | □2 | □3 | □4 | □5 | □6 | □7 |
| B3.2.我在我的社会关系中受人拥护和爱戴 | □1               | □2 | □3 | □4 | □5 | □6 | □7 |
| B3.3.我平日的生活中充满乐趣      | □1               | □2 | □3 | □4 | □5 | □6 | □7 |
| B3.4.我会主动帮助他人获得幸福和快乐  | □1               | □2 | □3 | □4 | □5 | □6 | □7 |
| B3.5.我能胜任对我来说重要的事务    | □1               | □2 | □3 | □4 | □5 | □6 | □7 |
| B3.6.我是个好人而且生活得很幸福    | □1               | □2 | □3 | □4 | □5 | □6 | □7 |
| B3.7.我对我的未来很乐观        | □1               | □2 | □3 | □4 | □5 | □6 | □7 |
| B3.8.人们尊重我            | □1               | □2 | □3 | □4 | □5 | □6 | □7 |

### 第三部分 健康行为

- C1. 到目前为止，您是否吸够 100 支烟？  
☐否 ☐是
- C2 在过去 1 周，您有几天吸入（持续或者累计）别人吸烟产生的烟雾（15 分钟以上）？  
☐有 \_\_\_\_\_ 天 ☐没有
- C3. 您通常会在哪些地方被动吸烟？（可多选）  
☐家里 ☐工作场所 ☐公共交通工具及等候室  
☐娱乐场所 ☐餐厅 ☐其他(请标明) \_\_\_\_\_
- C4. 在过去 7 天中，您进行以下活动的时间：（请只记录每次至少持续 10 分钟的身体活动，没有请填写“0”）

| 身体活动类别                                                              | 过去 7 天中有 | 平均每天   |
|---------------------------------------------------------------------|----------|--------|
| a. <b>重身体活动</b> (重身体活动是指需要您花费大力气完成, 呼吸较平常明显增强的活动。)例如:               | ____天    | ____分钟 |
| b. <b>中等强度身体活动</b> (中等强度身体活动是指需要您花费中等力气完成, 呼吸较平常稍微增强的活动), 例如:       | ____天    | ____分钟 |
| c. <b>步行</b> (包括您工作时和在家中的步行, 交通行程的步行以及为了锻炼身体进行的步行。)                 | ____天    | ____分钟 |
| d. <b>静态</b> (包括您在工作单位和家中, 坐在办公桌前, 电脑前, 坐着或躺着看电视, 拜访朋友, 看书, 乘车等的时间) | ____天    | ____分钟 |

- C5. 您是否饮酒(如啤酒、葡萄酒、白酒、红酒、黄酒等)?  
☐是                      2) ☐否

## 第四部分 健康文化

| D. 企业健康文化                                 | 完全不同意                      | 1                          | 2                          | 3                          | 4                          | 5 | 完全同意 |
|-------------------------------------------|----------------------------|----------------------------|----------------------------|----------------------------|----------------------------|---|------|
| 针对您本人                                     |                            |                            |                            |                            |                            |   |      |
| D1 采用健康的生活方式对我来说很重要                       | <input type="checkbox"/> 1 | <input type="checkbox"/> 2 | <input type="checkbox"/> 3 | <input type="checkbox"/> 4 | <input type="checkbox"/> 5 |   |      |
| D2 与健康活动可以扩大朋友圈和认识更多新人                    | <input type="checkbox"/> 1 | <input type="checkbox"/> 2 | <input type="checkbox"/> 3 | <input type="checkbox"/> 4 | <input type="checkbox"/> 5 |   |      |
| D3 工会由于采纳健康的行为方式受到表彰或重视                   | <input type="checkbox"/> 1 | <input type="checkbox"/> 2 | <input type="checkbox"/> 3 | <input type="checkbox"/> 4 | <input type="checkbox"/> 5 |   |      |
| D4 我的家庭成员或合租者支持别人采纳健康的行为生活方式，在我们公司，这些是正常的 | <input type="checkbox"/> 1 | <input type="checkbox"/> 2 | <input type="checkbox"/> 3 | <input type="checkbox"/> 4 | <input type="checkbox"/> 5 |   |      |
| 针对您的直接领导                                  |                            |                            |                            |                            |                            |   |      |

|                                                    |                            |                            |                            |                            |                            |
|----------------------------------------------------|----------------------------|----------------------------|----------------------------|----------------------------|----------------------------|
| D5 我的直接领导者喜欢吸烟                                     | <input type="checkbox"/> 1 | <input type="checkbox"/> 2 | <input type="checkbox"/> 3 | <input type="checkbox"/> 4 | <input type="checkbox"/> 5 |
| D6 我的直接领导者喜欢饮酒                                     | <input type="checkbox"/> 1 | <input type="checkbox"/> 2 | <input type="checkbox"/> 3 | <input type="checkbox"/> 4 | <input type="checkbox"/> 5 |
| D7 我的直接领导者喜欢锻炼身体                                   | <input type="checkbox"/> 1 | <input type="checkbox"/> 2 | <input type="checkbox"/> 3 | <input type="checkbox"/> 4 | <input type="checkbox"/> 5 |
| D8 我的直接领导者会劝我吸烟                                    | <input type="checkbox"/> 1 | <input type="checkbox"/> 2 | <input type="checkbox"/> 3 | <input type="checkbox"/> 4 | <input type="checkbox"/> 5 |
| D9 我的直接领导者会劝我饮酒                                    | <input type="checkbox"/> 1 | <input type="checkbox"/> 2 | <input type="checkbox"/> 3 | <input type="checkbox"/> 4 | <input type="checkbox"/> 5 |
| D10 我的直接领导者希望我加班                                   | <input type="checkbox"/> 1 | <input type="checkbox"/> 2 | <input type="checkbox"/> 3 | <input type="checkbox"/> 4 | <input type="checkbox"/> 5 |
| D11 我的直接领导者会鼓励我锻炼身体                                | <input type="checkbox"/> 1 | <input type="checkbox"/> 2 | <input type="checkbox"/> 3 | <input type="checkbox"/> 4 | <input type="checkbox"/> 5 |
| D12 我的直接领导支持员工采纳健康的行为生活方式                          | <input type="checkbox"/> 1 | <input type="checkbox"/> 2 | <input type="checkbox"/> 3 | <input type="checkbox"/> 4 | <input type="checkbox"/> 5 |
| D13 我的直接领导相互支持采纳健康的行为生活方式                          | <input type="checkbox"/> 1 | <input type="checkbox"/> 2 | <input type="checkbox"/> 3 | <input type="checkbox"/> 4 | <input type="checkbox"/> 5 |
| <b>针对公司整体</b>                                      |                            |                            |                            |                            |                            |
| D14 公司通过提供时间、地点和资金来支持健康项目                          | <input type="checkbox"/> 1 | <input type="checkbox"/> 2 | <input type="checkbox"/> 3 | <input type="checkbox"/> 4 | <input type="checkbox"/> 5 |
| D15 我们公司教育员工要有健康的生活方式                              | <input type="checkbox"/> 1 | <input type="checkbox"/> 2 | <input type="checkbox"/> 3 | <input type="checkbox"/> 4 | <input type="checkbox"/> 5 |
| D16 公司新员工注意到公司对健康行为方式的支持                           | <input type="checkbox"/> 1 | <input type="checkbox"/> 2 | <input type="checkbox"/> 3 | <input type="checkbox"/> 4 | <input type="checkbox"/> 5 |
| D17 不健康的行为方式（如吸烟和酗酒）不被鼓励                           | <input type="checkbox"/> 1 | <input type="checkbox"/> 2 | <input type="checkbox"/> 3 | <input type="checkbox"/> 4 | <input type="checkbox"/> 5 |
| D18 在我们公司，人们具有团队精神（如，人们真的了解别人，有归属感，当别人有需要时能及时提供帮助） | <input type="checkbox"/> 1 | <input type="checkbox"/> 2 | <input type="checkbox"/> 3 | <input type="checkbox"/> 4 | <input type="checkbox"/> 5 |
| D19 我们公司有共识（例如，人们感到企业的工作是与他们的个人价值观是一致的）            | <input type="checkbox"/> 1 | <input type="checkbox"/> 2 | <input type="checkbox"/> 3 | <input type="checkbox"/> 4 | <input type="checkbox"/> 5 |
| D20 我们公司有积极向上的理念（例如：在享受工作，庆祝成功，接受“我能做到”的观点）        | <input type="checkbox"/> 1 | <input type="checkbox"/> 2 | <input type="checkbox"/> 3 | <input type="checkbox"/> 4 | <input type="checkbox"/> 5 |
