# Supplementary material for: [Foley catheter versus prostaglandin E2 gel for induction of labour at term: the PROBAAT study]
Source: PLOS journal article supplement (doi:10.1371/journal.pone.0178644), 2012-01-01
Supplement: S3 (10.1371/journal.pone.0178644.s003) [file journal.pone.0178644.s003]

## Supplementary materials for data testing

### 1. Test for multilevel model

There should be a two-level hierarchical linear model with people clustered within workplaces. We had tested whether the data is applicable to multi-level analysis by SAS.9.3. The results were as follows.

- (1) For self-rated health, we found that ICC( intraclass correlation coefficient)= $0.1907/(0.1907+3.29) = 0.054788$ . Among all the 16 workplaces, there were only two significant random effect.

| Parameter Estimation of Covariance (SRH as a dependent variable) |           |                      |                |
|------------------------------------------------------------------|-----------|----------------------|----------------|
| Covariance parameter                                             | Variable  | Parameter Estimation | Standard error |
| Intercept                                                        | Workplace | 0.004624             | 0.002459       |
| Residual                                                         |           | 0.1907               | 0.007003       |

| Fixed effect(SRH as a dependent variable) |                      |                |                    |       |         |
|-------------------------------------------|----------------------|----------------|--------------------|-------|---------|
| Effect                                    | Parameter Estimation | Standard error | Degrees of freedom | t     | P       |
| Intercept                                 | 0.7335               | 0.02051        | 15                 | 35.75 | <0.0001 |

| Random effect(SRH as a dependent variable) |              |                      |              |       |               |
|--------------------------------------------|--------------|----------------------|--------------|-------|---------------|
| Effect                                     | Variable     | Parameter Estimation | Std Err Pred | t     | P             |
| Intercept                                  | Workplace 1  | -0.01073             | 0.0392       | -0.27 | 0.7844        |
| Intercept                                  | Workplace 2  | 0.04614              | 0.03824      | 1.21  | 0.2278        |
| Intercept                                  | Workplace 3  | 0.0218               | 0.03815      | 0.57  | 0.5678        |
| Intercept                                  | Workplace 4  | -0.0336              | 0.03931      | -0.85 | 0.3927        |
| Intercept                                  | Workplace 5  | 0.0274               | 0.03714      | 0.74  | 0.4608        |
| Intercept                                  | Workplace 6  | 0.08892              | 0.03746      | 2.37  | <b>0.0177</b> |
| Intercept                                  | Workplace 7  | 0.0469               | 0.04369      | 1.07  | 0.2832        |
| Intercept                                  | Workplace 8  | -0.04996             | 0.04454      | -1.12 | 0.2621        |
| Intercept                                  | Workplace 9  | 0.004276             | 0.03995      | 0.11  | 0.9148        |
| Intercept                                  | Workplace 10 | 0.08256              | 0.04471      | 1.85  | 0.065         |
| Intercept                                  | Workplace 11 | 0.004623             | 0.03951      | 0.12  | 0.9069        |
| Intercept                                  | Workplace 12 | -0.1327              | 0.03962      | -3.35 | <b>0.0008</b> |
| Intercept                                  | Workplace 13 | -0.05401             | 0.03995      | -1.35 | 0.1765        |
| Intercept                                  | Workplace 14 | 0.01899              | 0.04088      | 0.46  | 0.6423        |
| Intercept                                  | Workplace 15 | -0.00996             | 0.04507      | -0.22 | 0.8252        |
| Intercept                                  | Workplace 16 | -0.05064             | 0.04088      | -1.24 | 0.2156        |

(2) For mental health, we found that ICC( intraclass correlation coefficient)= $0.1469/(0.1469+3.29) = 0.042742$ . Among all the 16 workplaces, there were only two significant random effect.

| Parameter Estimation of Covariance (Mental health as a dependent variable) |           |                      |                |
|----------------------------------------------------------------------------|-----------|----------------------|----------------|
| Covariance parameter                                                       | Variable  | Parameter Estimation | Standard error |
| Intercept                                                                  | Workplace | 0.005294             | 0.002565       |
| Residual                                                                   |           | 0.1469               | 0.005406       |

| Fixed effect(Mental health as a dependent variable) |                      |                |                    |       |         |
|-----------------------------------------------------|----------------------|----------------|--------------------|-------|---------|
| Effect                                              | Parameter Estimation | Standard error | Degrees of freedom | t     | P       |
| Intercept                                           | 0.8115               | 0.02081        | 15                 | 38.99 | <0.0001 |

| Random effect(Mental health as a dependent variable) |              |                      |              |       |               |
|------------------------------------------------------|--------------|----------------------|--------------|-------|---------------|
| Effect                                               | Variable     | Parameter Estimation | Std Err Pred | t     | P             |
| Intercept                                            | Workplace 1  | 0.07205              | 0.03731      | 1.93  | 0.0537        |
| Intercept                                            | Workplace 2  | -0.04544             | 0.03664      | -1.24 | 0.2151        |
| Intercept                                            | Workplace 3  | 0.06612              | 0.03637      | 1.82  | 0.0693        |
| Intercept                                            | Workplace 4  | -0.00613             | 0.03692      | -0.17 | 0.8682        |
| Intercept                                            | Workplace 5  | 0.05045              | 0.0353       | 1.43  | 0.1532        |
| Intercept                                            | Workplace 6  | 0.04581              | 0.0357       | 1.28  | 0.1996        |
| Intercept                                            | Workplace 7  | -0.0332              | 0.04186      | -0.79 | 0.4279        |
| Intercept                                            | Workplace 8  | 0.0207               | 0.04275      | 0.48  | 0.6283        |
| Intercept                                            | Workplace 9  | 0.01697              | 0.03805      | 0.45  | 0.6556        |
| Intercept                                            | Workplace 10 | 0.1089               | 0.04275      | 2.55  | <b>0.011</b>  |
| Intercept                                            | Workplace 11 | 0.02506              | 0.03805      | 0.66  | 0.5103        |
| Intercept                                            | Workplace 12 | -0.04392             | 0.03783      | -1.16 | 0.2459        |
| Intercept                                            | Workplace 13 | -0.1392              | 0.03816      | -3.65 | <b>0.0003</b> |
| Intercept                                            | Workplace 14 | -0.00863             | 0.03936      | -0.22 | 0.8264        |
| Intercept                                            | Workplace 15 | -0.07621             | 0.04332      | -1.76 | 0.0787        |
| Intercept                                            | Workplace 16 | -0.05327             | 0.03886      | -1.37 | 0.1706        |

(3) For happiness, we found that ICC( intraclass correlation coefficient)= $0.1607/(0.1607+3.29) = 0.04657$ . Among all the 16 workplaces, there were only three significant random effect

| Parameter Estimation of Covariance (Happiness as a dependent variable) |           |                      |                |
|------------------------------------------------------------------------|-----------|----------------------|----------------|
| Covariance parameter                                                   | Variable  | Parameter Estimation | Standard error |
| Intercept                                                              | Workplace | 0.01087              | 0.004647       |
| Residual                                                               |           | 0.1607               | 0.005925       |

| Fixed effect(Happiness as a dependent variable) |                      |                |                    |       |         |
|-------------------------------------------------|----------------------|----------------|--------------------|-------|---------|
| Effect                                          | Parameter Estimation | Standard error | Degrees of freedom | t     | P       |
| Intercept                                       | 0.7833               | 0.02815        | 15                 | 27.83 | <0.0001 |

| Random effect(Happiness as a dependent variable) |              |                      |              |       |                   |
|--------------------------------------------------|--------------|----------------------|--------------|-------|-------------------|
| Effect                                           | Variable     | Parameter Estimation | Std Err Pred | t     | P                 |
| Intercept                                        | Workplace 1  | 0.07066              | 0.04439      | 1.59  | 0.1116            |
| Intercept                                        | Workplace 2  | -0.00573             | 0.04342      | -0.13 | 0.8951            |
| Intercept                                        | Workplace 3  | 0.08209              | 0.04332      | 1.89  | 0.0583            |
| Intercept                                        | Workplace 4  | -0.01873             | 0.04416      | -0.42 | 0.6716            |
| Intercept                                        | Workplace 5  | -0.01202             | 0.04214      | -0.29 | 0.7756            |
| Intercept                                        | Workplace 6  | 0.09651              | 0.04266      | 2.26  | <b>0.0238</b>     |
| Intercept                                        | Workplace 7  | 0.06931              | 0.04976      | 1.39  | 0.1638            |
| Intercept                                        | Workplace 8  | 0.08554              | 0.05085      | 1.68  | 0.0927            |
| Intercept                                        | Workplace 9  | -0.03786             | 0.04523      | -0.84 | 0.4027            |
| Intercept                                        | Workplace 10 | 0.1241               | 0.05085      | 2.44  | <b>0.0148</b>     |
| Intercept                                        | Workplace 11 | -0.01769             | 0.0451       | -0.39 | 0.695             |
| Intercept                                        | Workplace 12 | -0.2815              | 0.04548      | -6.19 | <b>&lt;0.0001</b> |
| Intercept                                        | Workplace 13 | -0.06612             | 0.04575      | -1.45 | 0.1486            |
| Intercept                                        | Workplace 14 | -0.00142             | 0.04645      | -0.03 | 0.9756            |
| Intercept                                        | Workplace 15 | -0.07065             | 0.05181      | -1.36 | 0.1729            |
| Intercept                                        | Workplace 16 | -0.01649             | 0.04616      | -0.36 | 0.7211            |

(4) In summary, the results of testing showed that our data appeared not applicable to multi-level analysis. First, all the ICC were small. Second, the difference between the workplace level was very small and almost not statistical significant.

## 2. Test for multiple linear regression

We had tested whether the data is applicable to multiple linear regression analysis by SAS.9.3. The results were as follows.

- (1) For SRH: figure1 showed the variance nonhomogeneity of residual; figure 2 showed that SRH was close to normal distribution by normal distribution test; the other five figures showed that there was no significant linear correlation between the five variables of health culture and self-rated health.

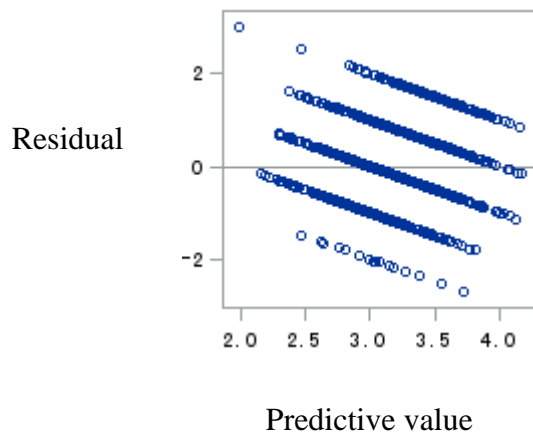

Figure 1. Test for Variance homogeneity of Residual

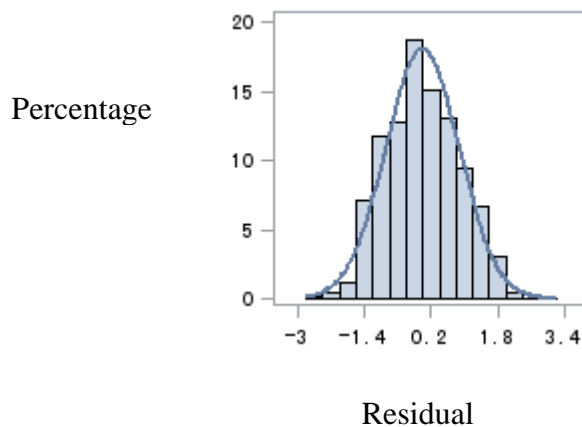

Figure 2. Test for Normality

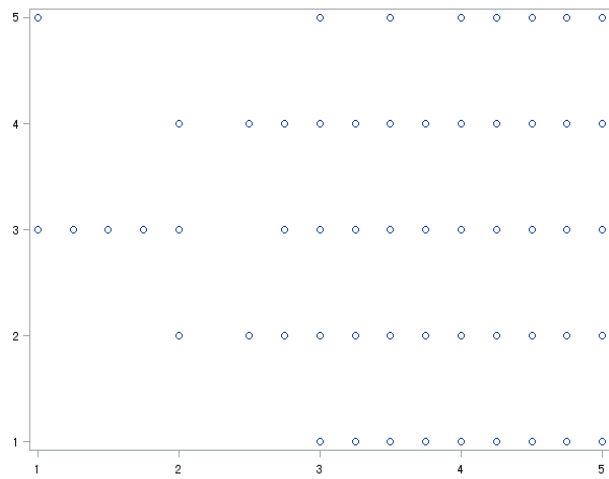

Figure 3. Scatter plot for SRH and Individual health culture

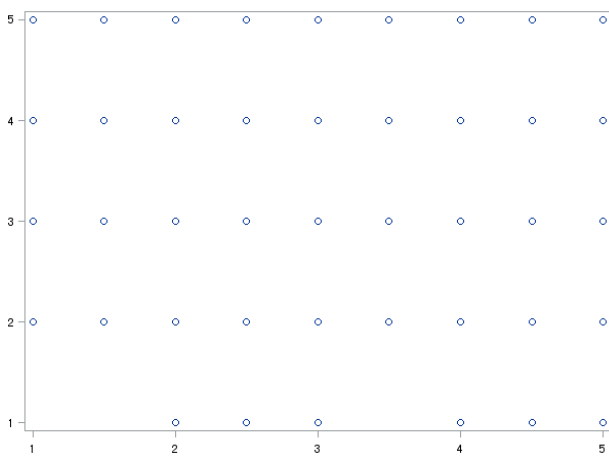

Figure 4. Scatter plot for SRH and Adverse health behaviors of direct leaders

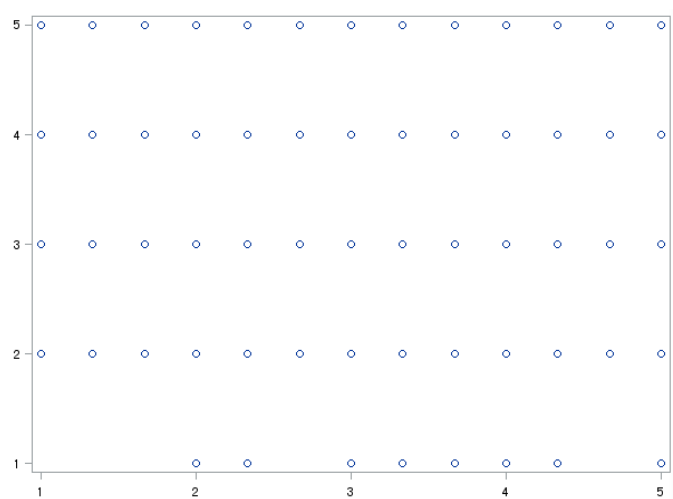

Figure 5. Scatter plot for SRH and Adverse health effects of direct leaders

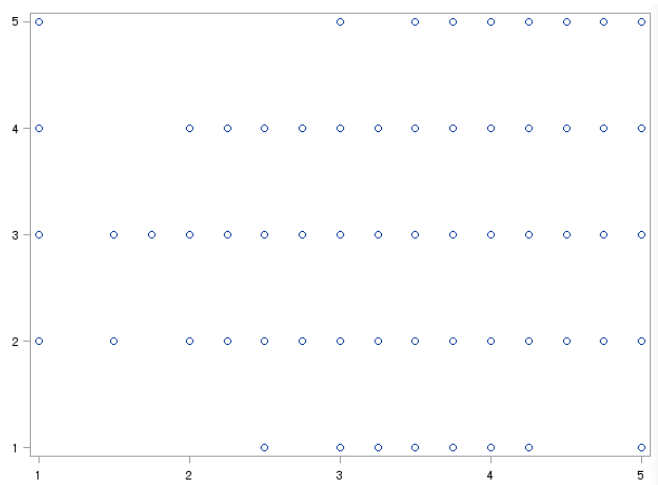

Figure 6. Scatter plot for SRH and Beneficial health effects of direct leaders

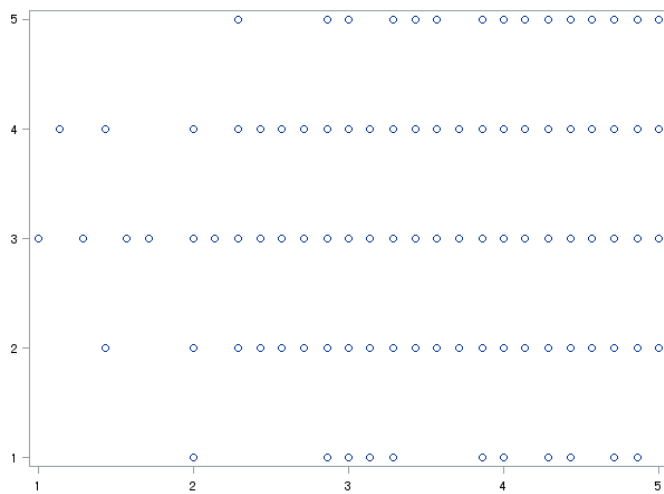

Figure 7. Scatter plot for SRH and Overall health culture

(2) For mental health: figure 8 showed the variance nonhomogeneity of residual; figure 9 showed that mental health was not close to normal distribution by normal distribution test; the other five figures showed that there was no significant linear correlation between the five variables of health culture and score of mental health.

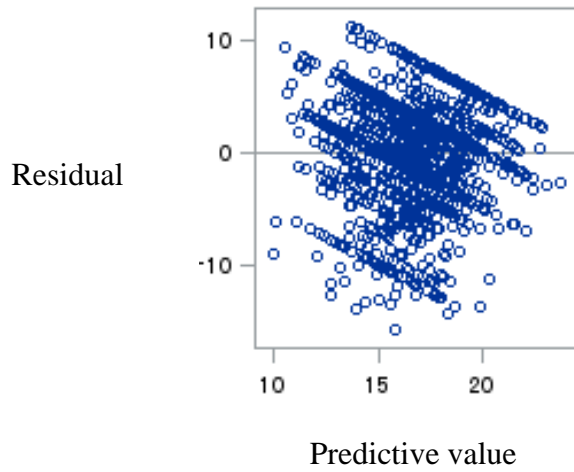

Figure 8. Test for Variance homogeneity of Residual

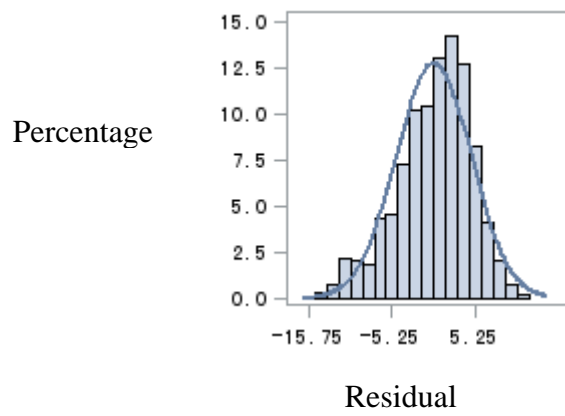

Figure 9. Test for Normality

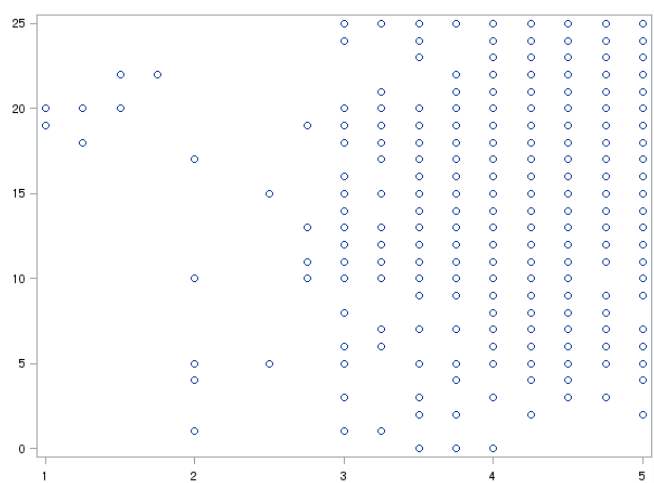

Figure 10. Scatter plot for mental health and individual health culture

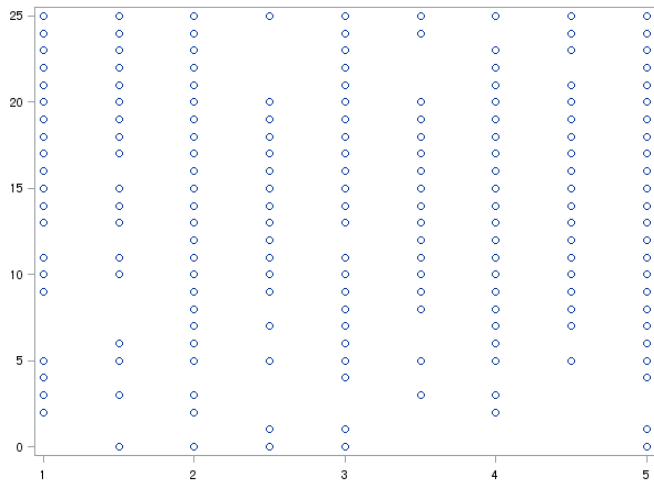

Figure 11. Scatter plot for mental health and adverse health behaviors of direct leaders

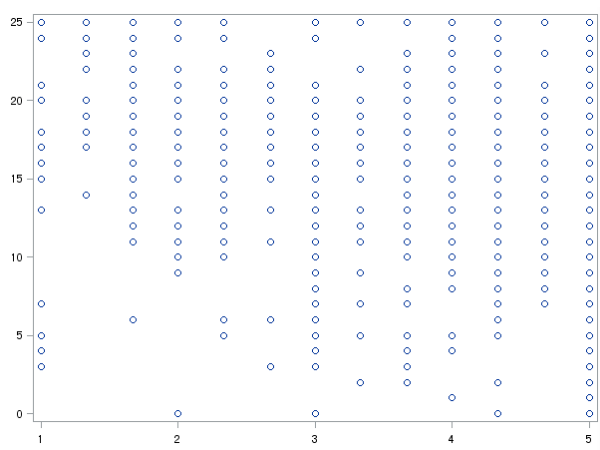

Figure 12. Scatter plot for mental health and adverse health effects of direct leaders

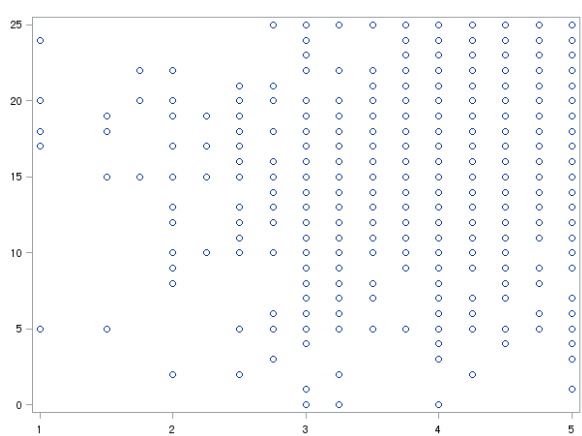

Figure 13. Scatter plot for mental health and beneficial health effects of direct leaders



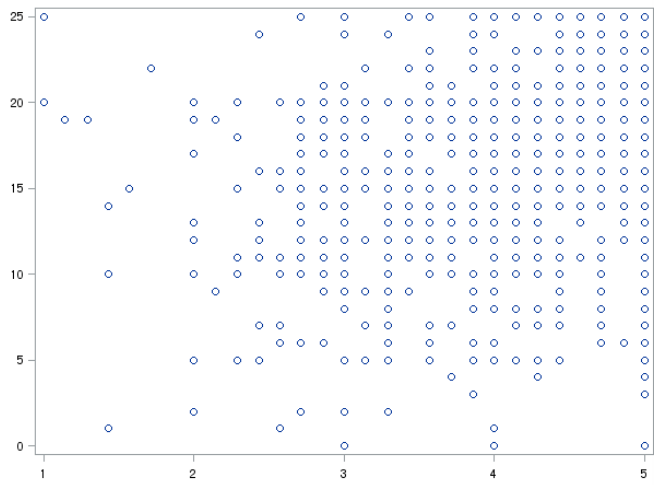

Figure 14. Scatter plot for mental health and Overall health culture

(3) For happiness: figure 15 showed the variance nonhomogeneity of residual; figure 16 showed that happiness was not close to normal distribution by normal distribution test; the other five figures showed that there was no significant linear correlation between the five variables of health culture and score of happiness.

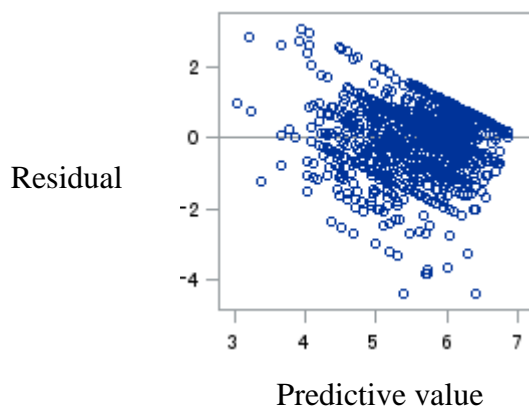

Figure 15. Test for Variance homogeneity of Residual

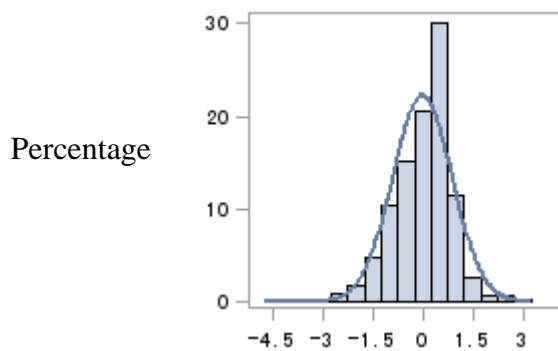

Figure 16. Test for Normality

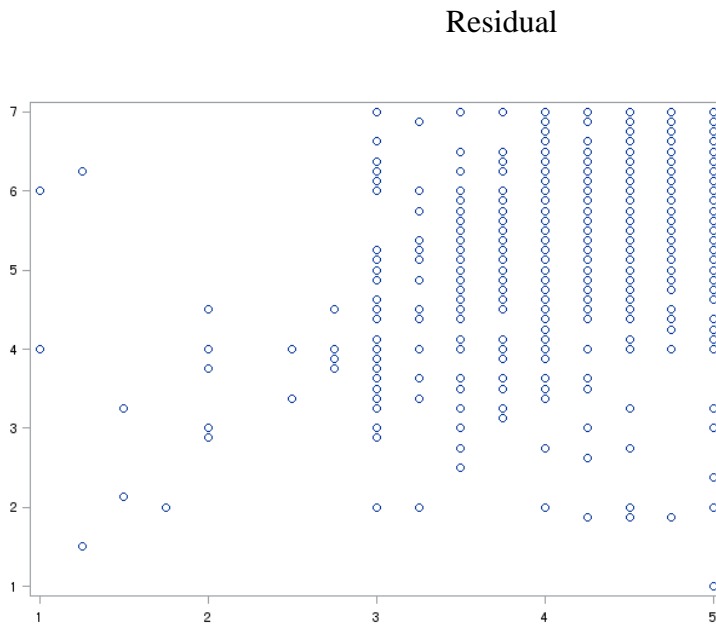

Figure 17. Scatter plot for happiness and individual health culture

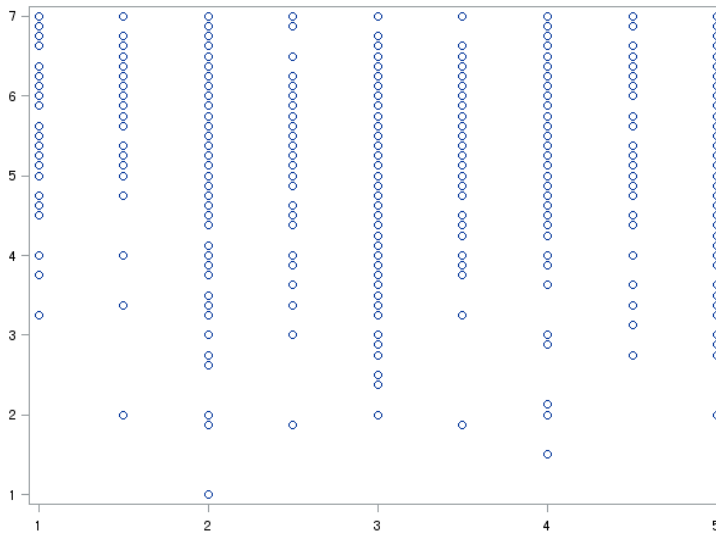

Figure 18. Scatter plot for happiness and adverse health behaviors of direct leaders

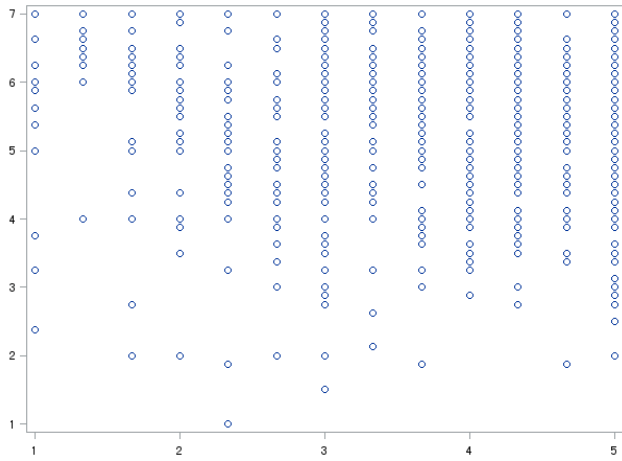

Figure 19. Scatter plot for happiness and adverse health effects of direct leaders

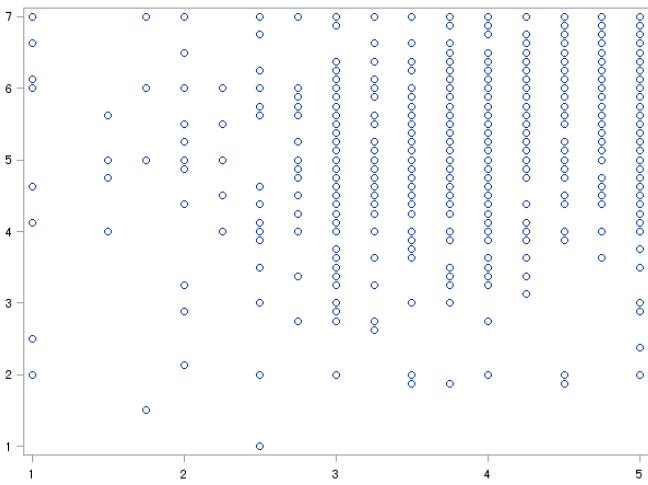

Figure 20. Scatter plot for happiness and beneficial health effects of direct leaders

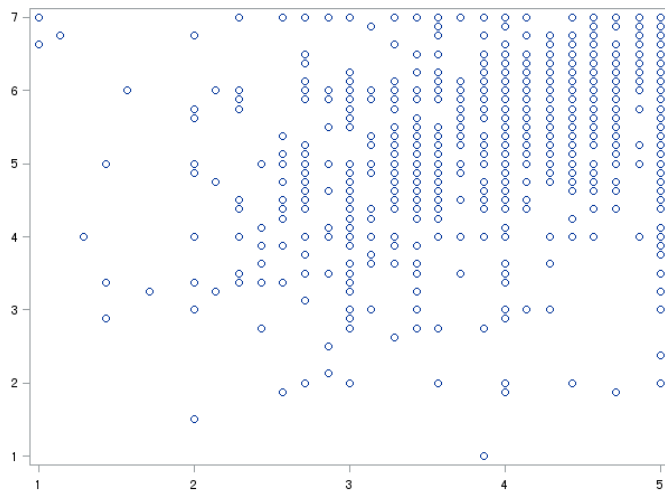

Figure 21. Scatter plot for happiness and Overall health culture

(4) In summary, the results of testing showed that our data appeared not applicable to multiple linear regression analysis due to the variance nonhomogeneity of residual and no significant linear correlation.
